# Supplementary material for: Mutation‐Specific Phenotypes in hiPSC‐Derived Cardiomyocytes Carrying Either Myosin‐Binding Protein C Or α‐Tropomyosin Mutation for Hypertrophic Cardiomyopathy
Source: Hindawi journal article supplement (doi:10.1155/2016/1684792), 2015-12-28
Supplement: f1 [file 1684792.f1.zip]

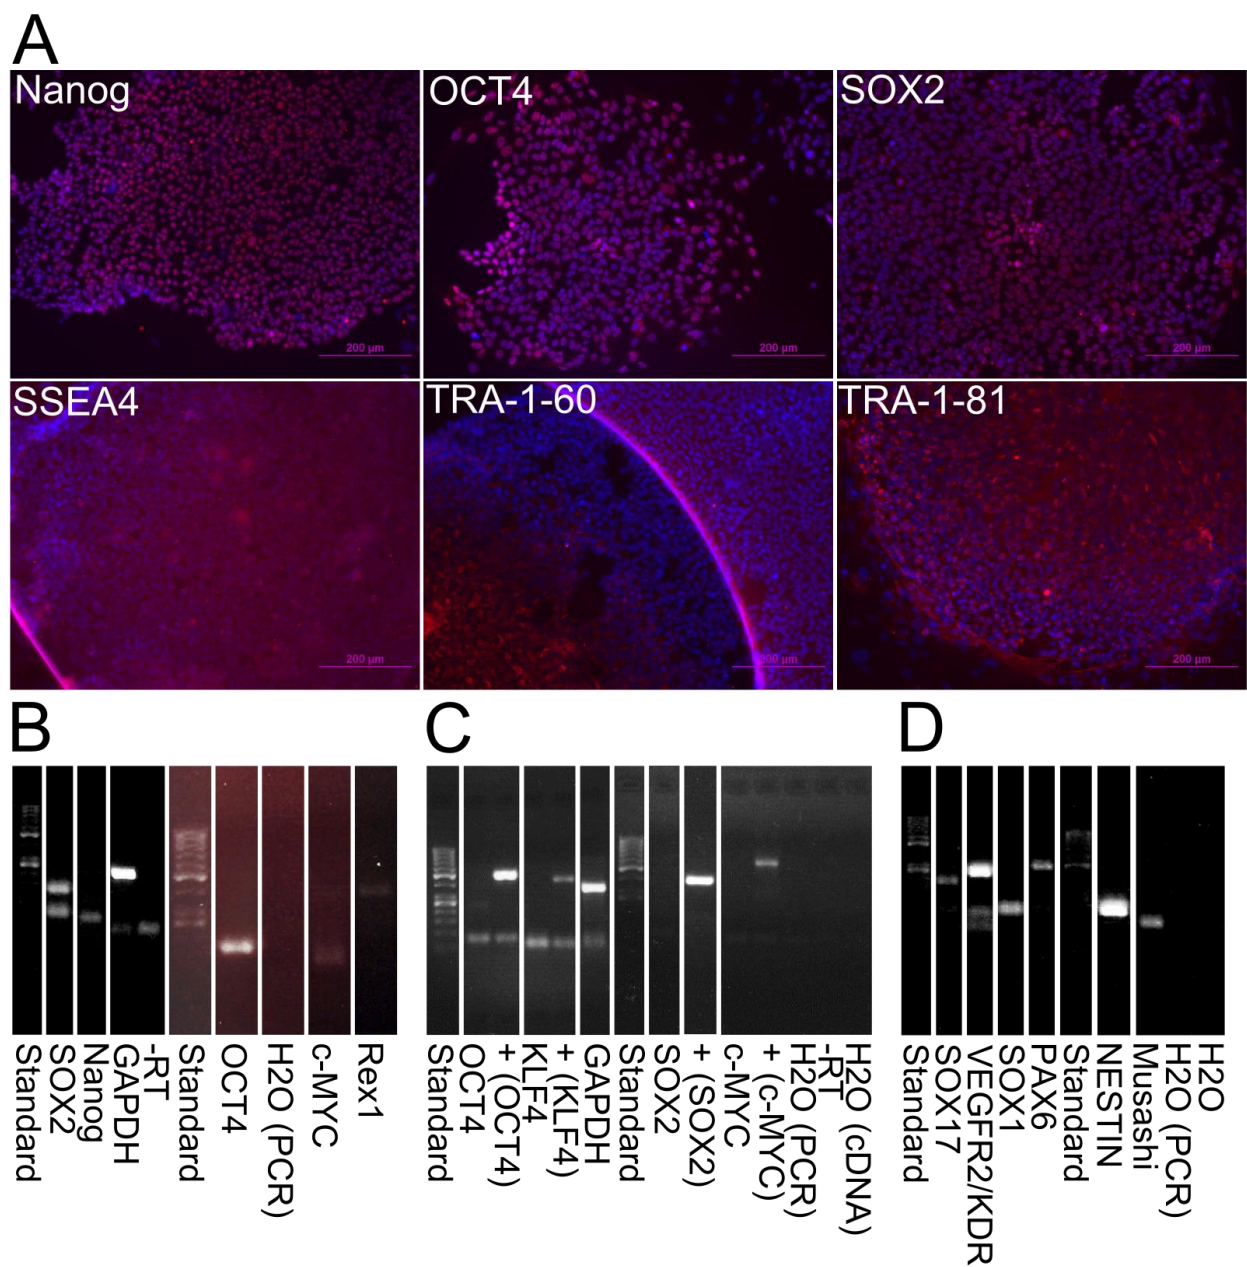

Supplementary Figure 1.

**A**

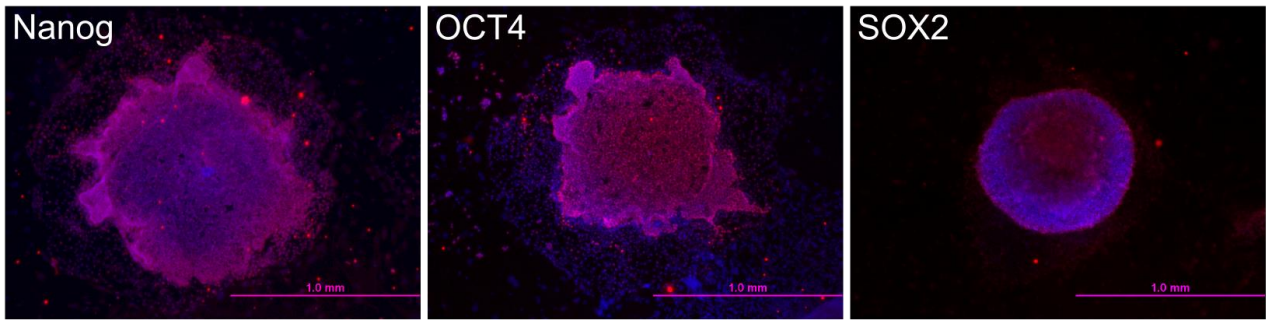

**B**

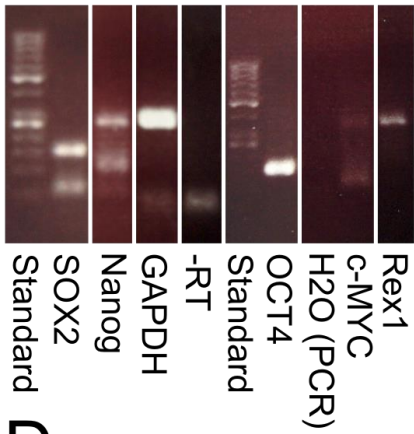

**C**

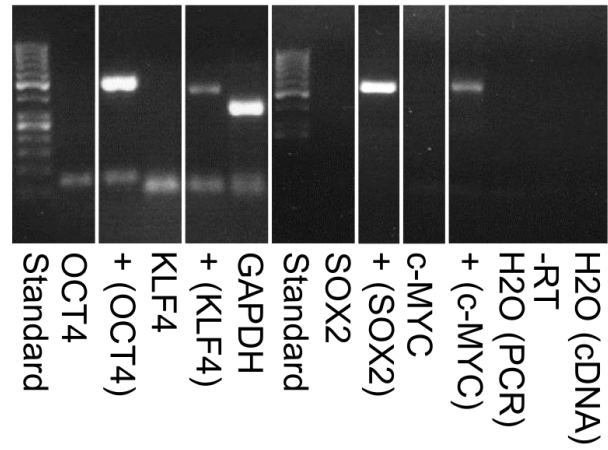

**D**

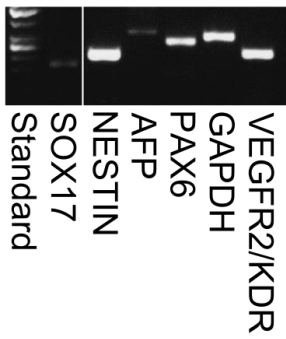

Supplementary Figure 2.



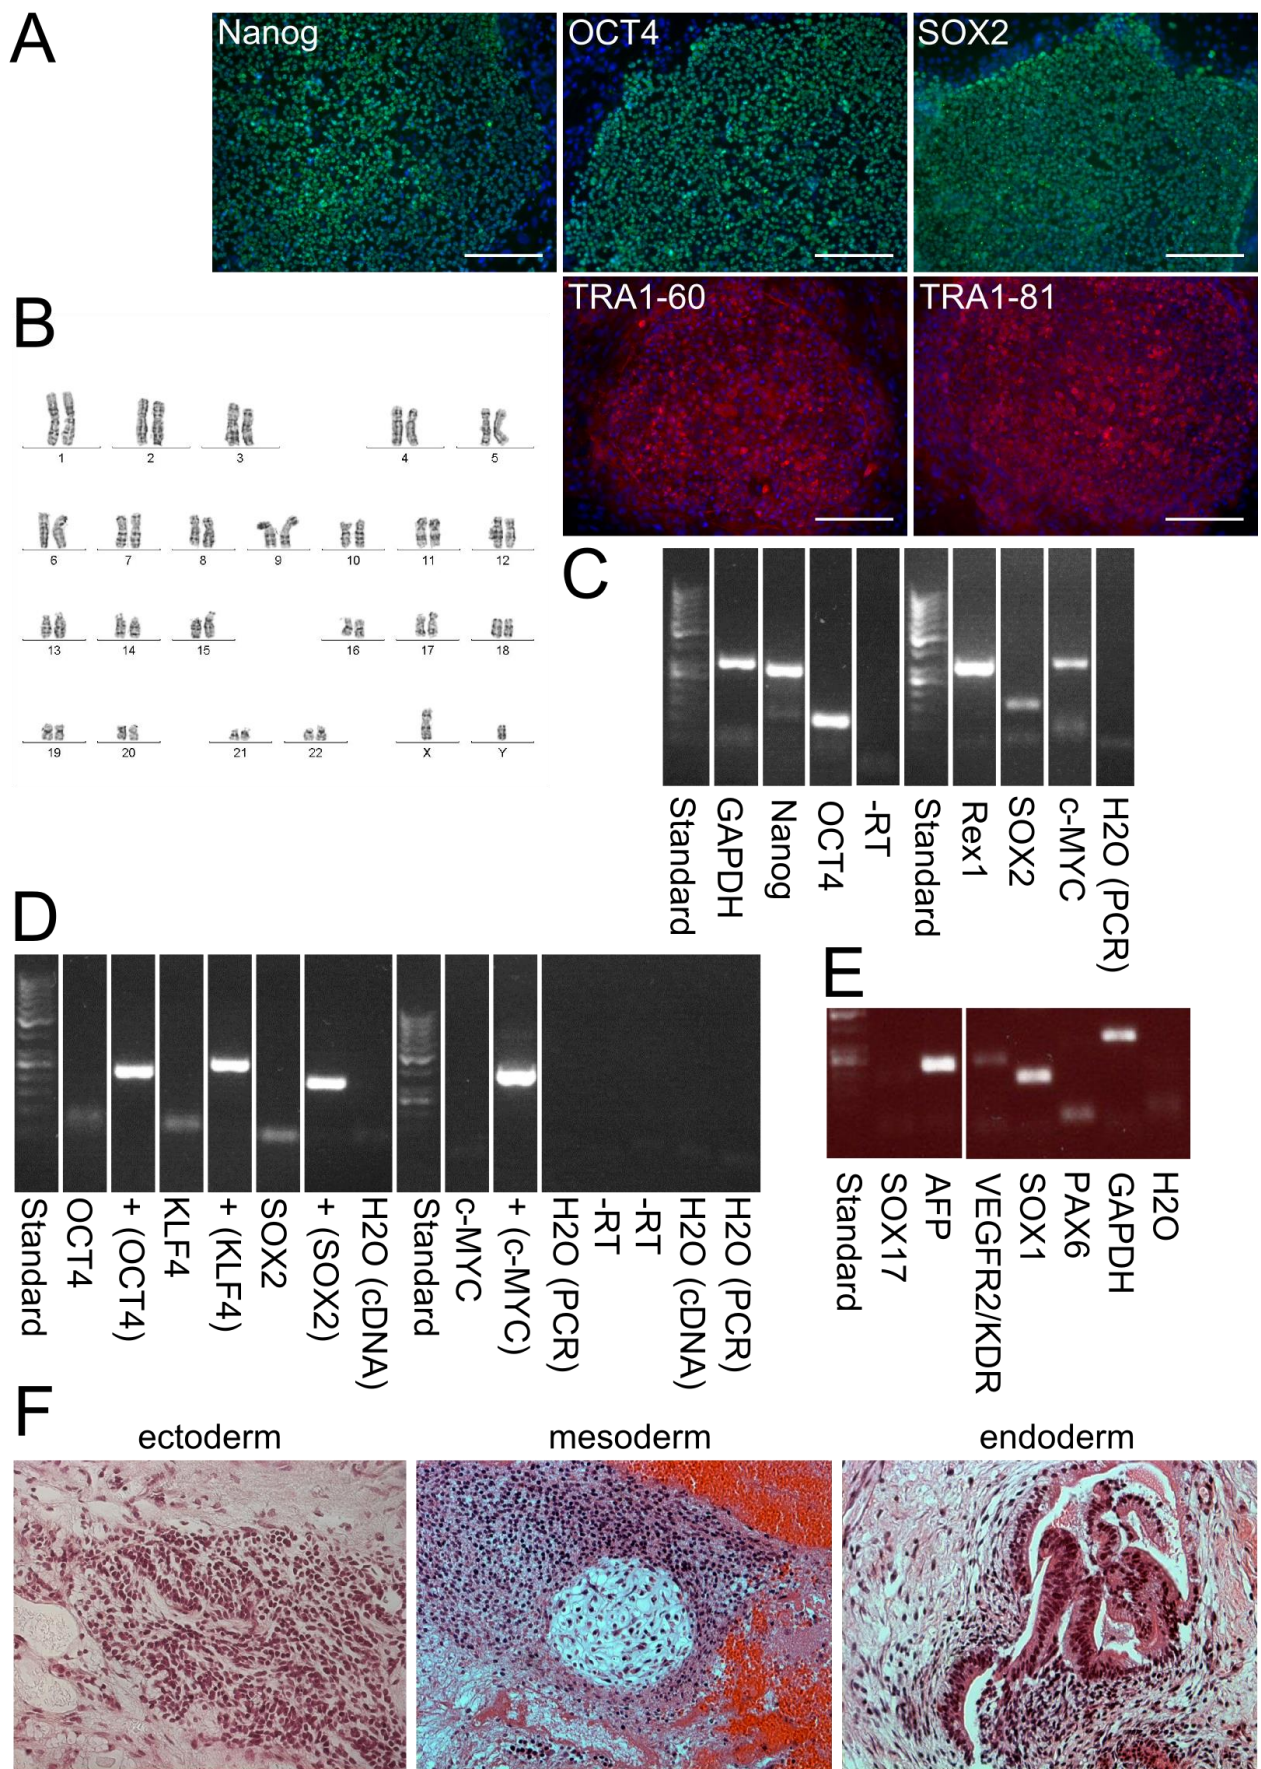

Supplementary Figure 3.

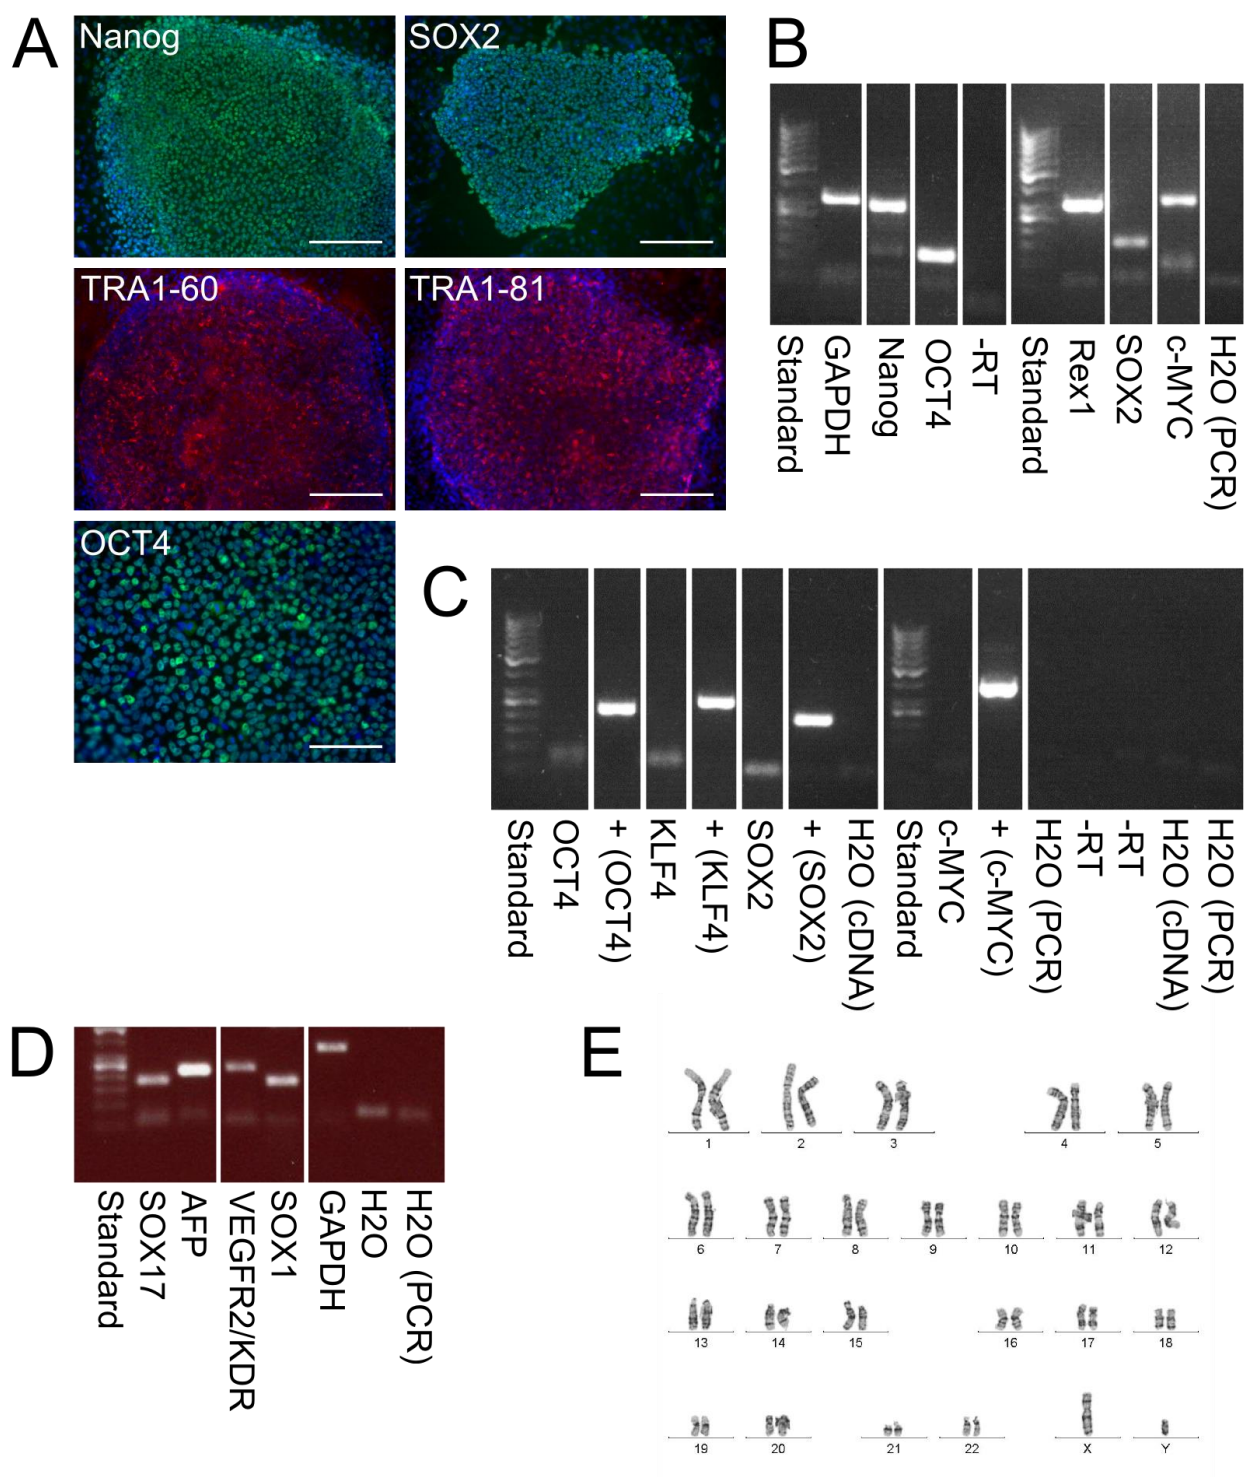

Supplementary Figure 4.

# A

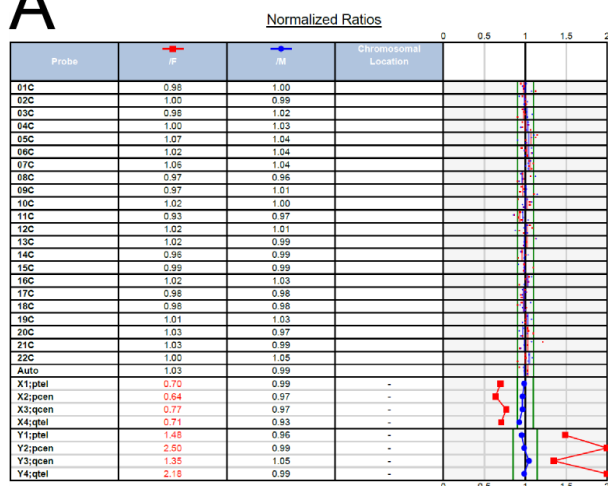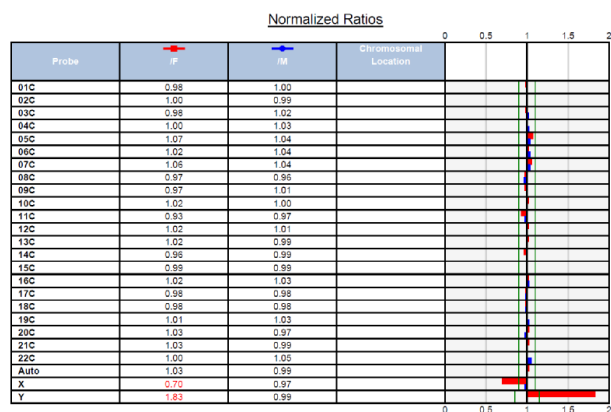

# B

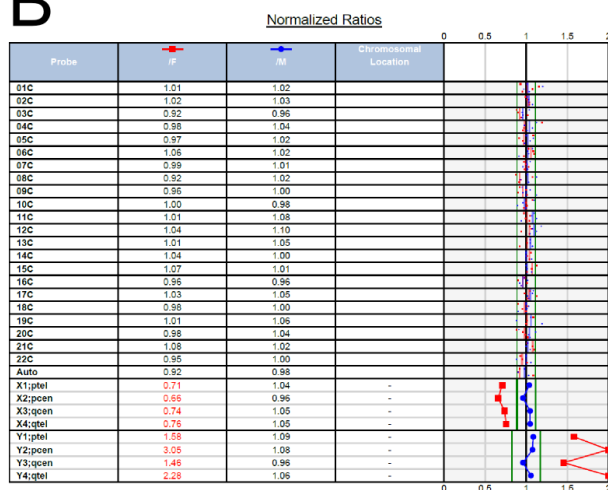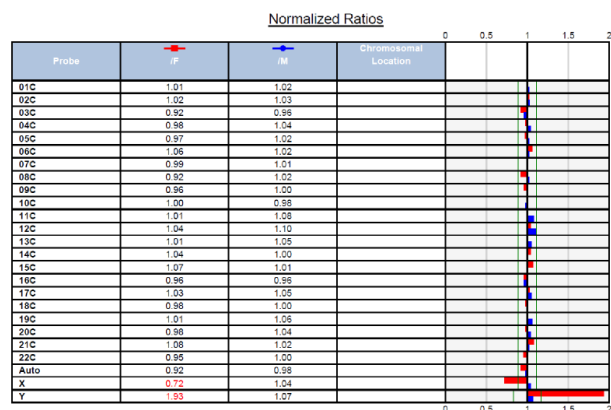

Supplementary Figure 5.

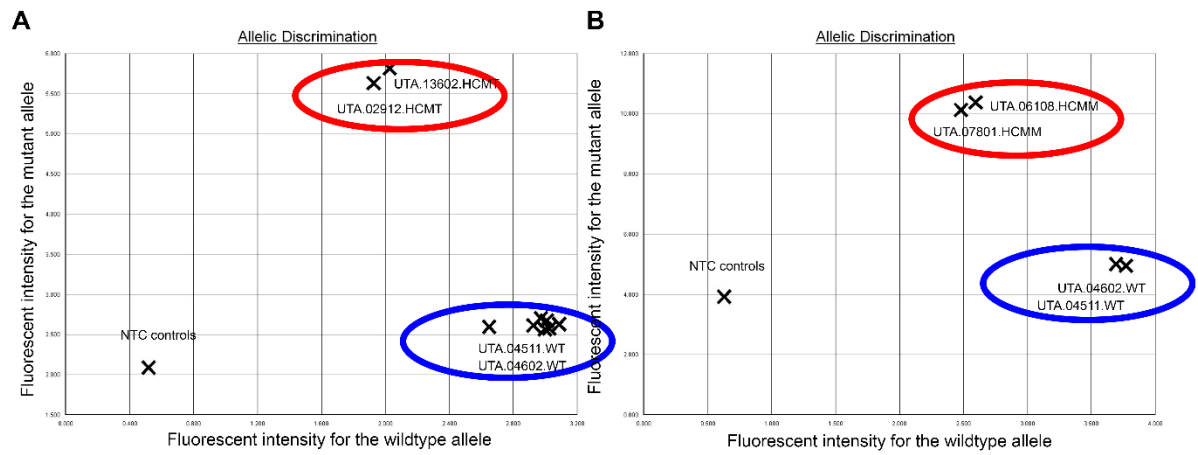

**Supplementary Figure 6.**

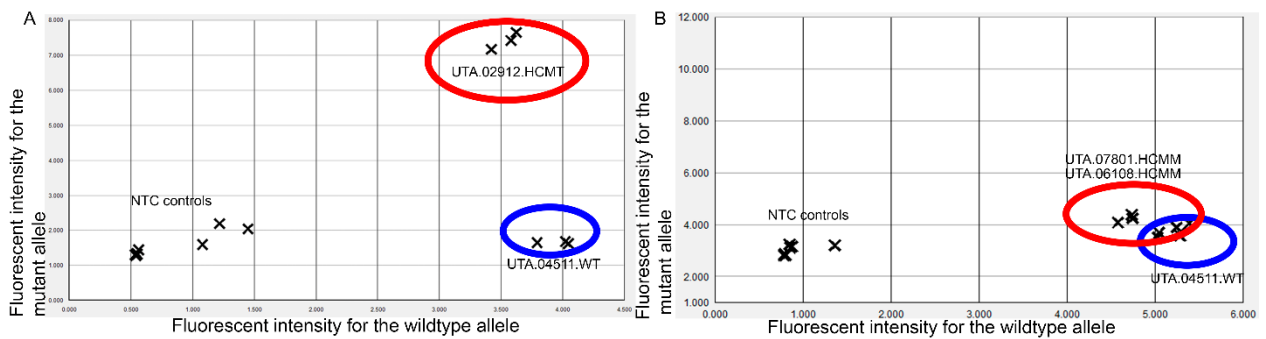

**Supplementary Figure 7.**

| <b>Mutation/application</b>              | <b>Task</b>                    | <b>Dye</b> | <b>Sequence</b>             |
|------------------------------------------|--------------------------------|------------|-----------------------------|
| <b>MYBPC-genotyping</b>                  | Forward primer                 |            | GCATTGAGAACATGGAGGACAAG     |
|                                          | Reverse primer                 |            | GCCCAGGGAAGGGAAACAAG        |
|                                          | Probe for the wild type allele | VIC        | CCAACAACCT <b>G</b> CAGCAC  |
|                                          | Probe for the mutation allele  | FAM        | CCAACAACCT <b>A</b> CAGCAC  |
| <b>MYBPC-mRNA</b>                        | Forward primer                 |            | GCATTGAGAACATGGAGGACAAG     |
|                                          | Reverse primer                 |            | TCAGTCACCCGGAGATCCT         |
|                                          | Probe for the wild type allele | VIC        | CAACAACCT <b>G</b> CAGCACC  |
|                                          | Probe for the mutation allele  | FAM        | TCAACAACCT <b>A</b> CAGCACC |
| <b>TPM1Asp175Asn-genotyping and mRNA</b> | Forward primer                 |            | GGCCCGTAAGCTGGTCAT          |
|                                          | Reverse primer                 |            | CCGCTCCTCTGCACGTT           |
|                                          | Probe for the wild type allele | VIC        | CATTGAGAGC <b>G</b> ACCTGG  |
|                                          | Probe for the mutation allele  | FAM        | ATTGAGAGC <b>A</b> ACCTGG   |

**Supplementary Table1.**
