# Supplementary material for: Mutation-Specific Phenotypes in hiPSC-Derived Cardiomyocytes Carrying Either Myosin-Binding Protein C Or α-Tropomyosin Mutation for Hypertrophic Cardiomyopathy
Source: Stem Cells Int. 2015 Dec 28;2016:1684792. doi: 10.1155/2016/1684792 (PMC4707351; doi:10.1155/2016/1684792)
Supplement: Supplementary file 1 — Supplementary Figure 1: Characterization of UTA.04511.WT cell line. Supplementary Figure 2: Characterization of UTA.02912.HCMT cell line. Supplementary Figure 3: Characterization of UTA.07801.HCMM cell line. Supplementary Figure 4: Characterization of UTA.06108.HCMM cell line. Supplementary Figure 5: Karyotype analyses of the cell lines A. UTA.04511.WT and B. UTA.02912.HCMT. Supplementary Figure 6: The presence of the TPM1-Asp175Asn and MYBPC3-Gln1061X mutation in the patient-specific hiPSC lines was confirmed by custom TaqMan SNP Genotyping Assays. Supplementary Figure 7: The mRNA expression of mutant and wildtype allelesin the hiPSC-derived CMs carrying TPM1-Asp175Asn or MYBPC3-Gln1061X mutation were assessed with the TaqMan SNP Genotyping Assays. Supplementary Table 1: Sequences of the primers and probes (Custom TaqMan SNP Genotyping Assays, Applied Biosystems, Life Technologies Ltd) used in the genotyping and mutant allele mRNA expression assays. [file 1684792.f1.zip]

Archive with 3 entries (2 files):
- 1684792.f1/
- 1684792.f1/mat.746594.v3.pdf
- 1684792.f1/Supplementary material.docx
